# Supplementary material for: Attenuation of Progressive Hearing Loss in DBA/2J Mice by Reagents that Affect Epigenetic Modifications Is Associated with Up-Regulation of the Zinc Importer Zip4
Source: PLOS journal article supplement (doi:10.1371/journal.pone.0124301), 2015-04-14
Supplement: S3 (10.1371/journal.pone.0124301.s003) [file journal.pone.0124301.s003]

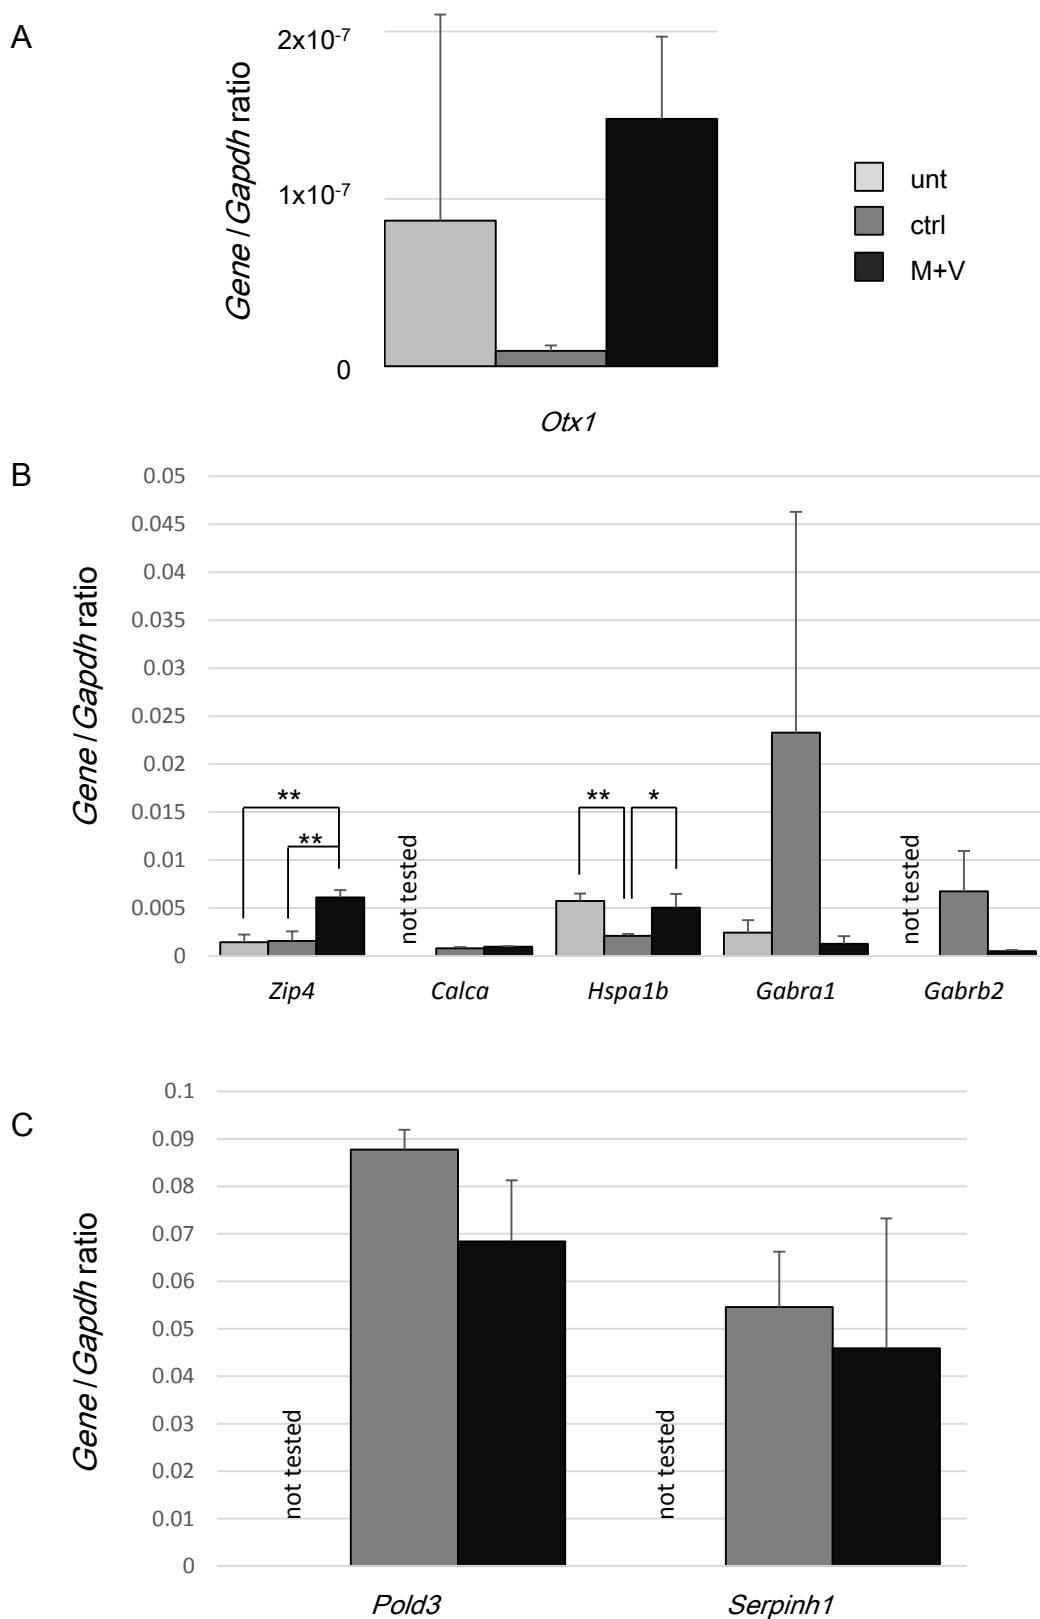

**S3\_Fig. Expression of candidate genes in the whole cochleae of DBA mice treated with M+V.** Expression levels were assessed by qRT-PCR and quantified by the  $\Delta$ Ct method for each gene and compared with *Gapdh*. *Otx1*, *Zip4*, *Calca*, *Hspa1b*, *Pold3*, and *Serpinh1* were selected from the list of genes with significantly higher transcripts and *Gabra1* and *Gabrb2* from the list with significantly lower transcripts in M+V-treated cochleae relative to control cochleae. Data are shown as the mean  $\pm$  s.d.; \* $p$  < 0.05; \*\* $p$  < 0.01 (N = 3 mice, one-way ANOVA and Scheffe's test).
